# Supplementary material for: MicroRNA-597-3p targets MACC1 to suppress proliferation and invasion of human ovarian cancer cells
Source: PeerJ journal article supplement (doi:10.7717/peerj.20316), 2025-11-04
Supplement: Supplementary_Table_1.docx [file Supplementary_Table_1.docx]

Supplementary Table 1: List of primers used in the study.

| Primer | Direction | Sequence |
| --- | --- | --- |
| Bax | Forward | TCAGGATGCGTCCACCAAGAAG |
|  | Reverse | TGTGTCCACGGCGGCAATCATC |
| Bcl-2 | Forward | ATCGCCCTGTGGATGACTGAGT |
|  | Reverse | GCCAGGAGAAATCAAACAGAGGC |
|  | Reverse | AGGTGGACCTGGAGACTCTCAG |
| MMP-2 | Forward | CCTGAATACTTTCTATGGCTGC |
|  | Reverse | GTATGTAGT GGA GCACCAGAGC |
| MMP-9 | Forward | GCCACTACTGTGCCTTTGAGTC |
|  | Reverse | CCCTCAGAGAATCGCCAGTACT |
| U6 | Forward | CTCGCTTCGGCAGCACA |
|  | Reverse | AACGCTTCACGAATTTGCGT |
| GADPH | Forward | GGCTGTAGACCAGGATGAAG |
|  | Reverse | TTGGAGGGATCTCGCTCCT |
| miR-597-3p | Forward | ACACTCCAGGTCGGGTGGT |
|  | Reverse | ATTGGAACGATACAGAGAAGATT |
