# Supplementary material for: MicroRNA-597-3p targets MACC1 to suppress proliferation and invasion of human ovarian cancer cells
Source: PeerJ journal article supplement (doi:10.7717/peerj.20316), 2025-11-04
Supplement: Supplementary_Table_2.docx [file Supplementary_Table_2.docx]

**Supplementary Table 2:** Common targets of miR-199a-5p identified from 4 different online databases (TargetScan, and miRDB, TarBase)

| Target gene | Representative transcript | Gene name |
| --- | --- | --- |
| FAM160B1 | ENST00000369248.4 | Family with sequence similarity 160, member B1 |
| MACC1 | ENST00000400331.5 | Metastasis associated in colon cancer 1 |
| PPTC7 | ENST00000354300.3 | PTC7 protein phosphatase homolog |
| SLC38A2 | ENST00000256689.5 | Solute carrier family 38, member 2 |
| PSMC4 | ENST00000157812.2 | Proteasome (prosome, macropain) 26S subunit, ATPase, 4 |
